# Supplementary material for: Synthesis, electropolymerization and functionalization via click chemistry of N-alkynylated dithieno[3,2-b:2′,3′-d]pyrrole
Source: Royal Society of Chemistry journal article supplement (doi:10.1039/d2ra03265a), 2022-01-01

Supporting Information for

**Synthesis, electropolymerization and functionalization *via* click chemistry of new N-alkynylated dithieno[3,2-*b*:2',3'-*d*]pyrrole**

Yuriy Bandera, Haley W. Jones, Benjamin Grant, Sarah Mell, Stephen H. Foulger

*Center for Optical Materials Science and Engineering Technologies (COMSET), Clemson University, Anderson, SC 29625, USA*

*Department of Materials Science and Engineering, Clemson University, Clemson, SC 29634, USA.*

*Department of Bioengineering, Clemson University, Clemson, SC 29634, USA*

*E-mail: [foulger@clemson.edu](mailto:foulger@clemson.edu)*

**Table of Contents:**

|                   |     |
|-------------------|-----|
| 1. NMR data.....  | 2-5 |
| 2. Mass data..... | 6-9 |

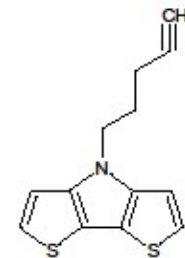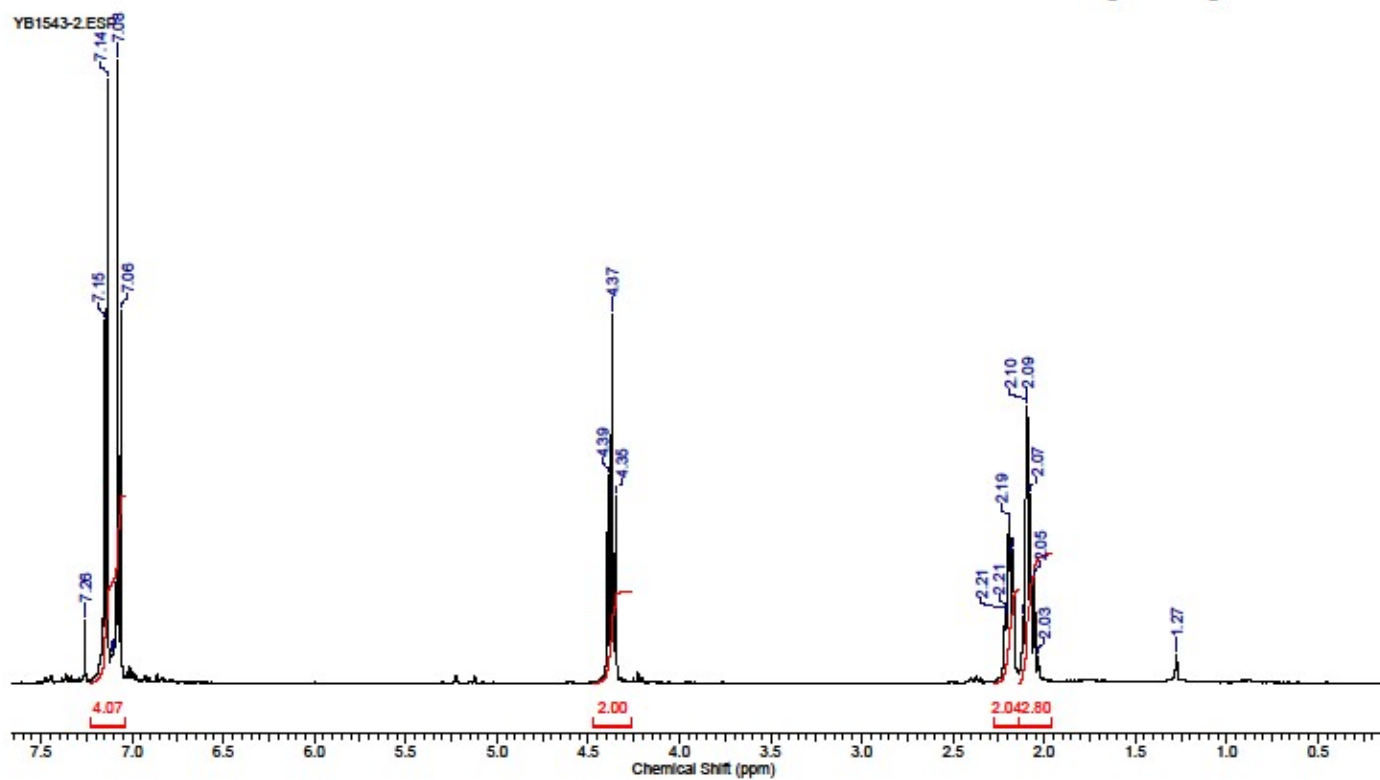

<sup>1</sup>H NMR AlkyneDTP

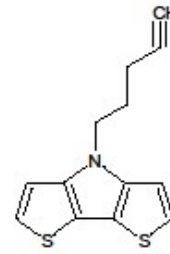

YB1543-C13-1.ESP

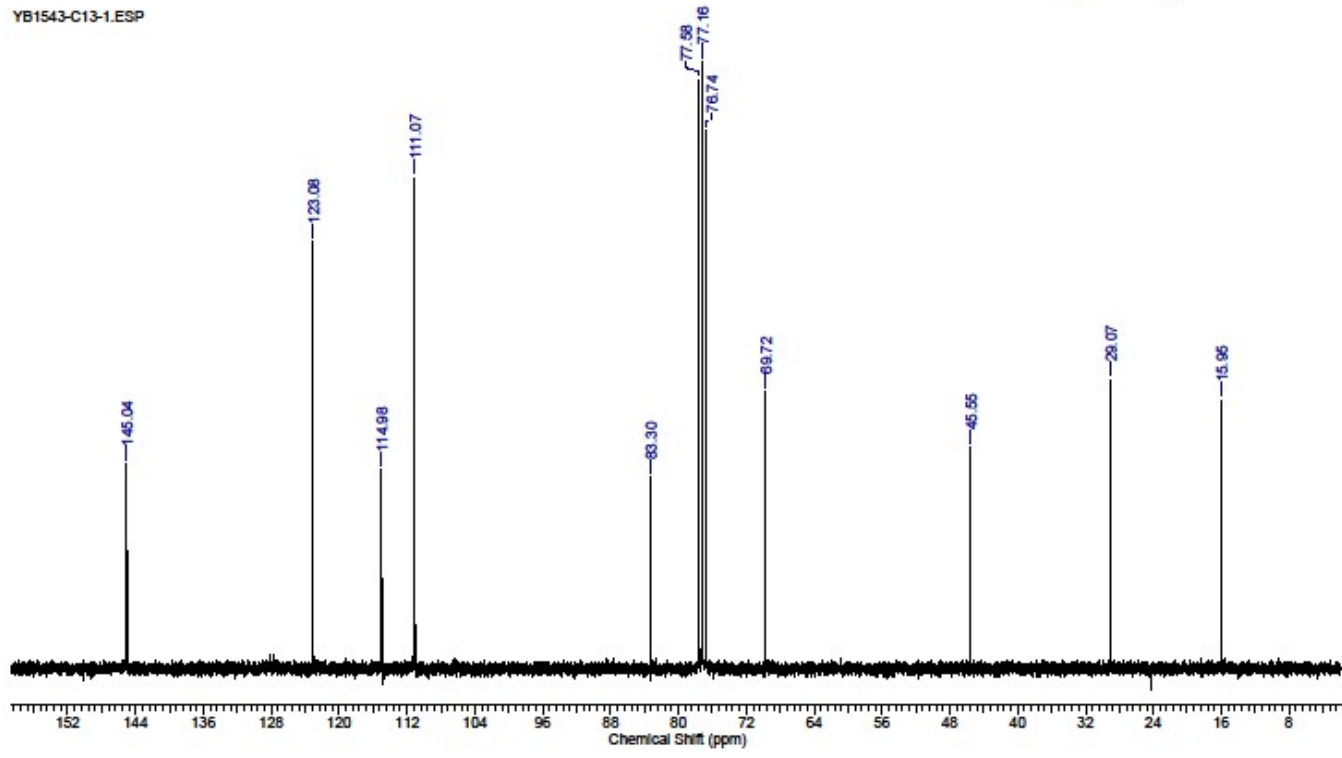

<sup>13</sup>C NMR AlkyneDTP

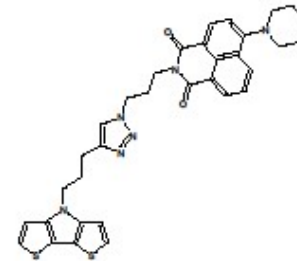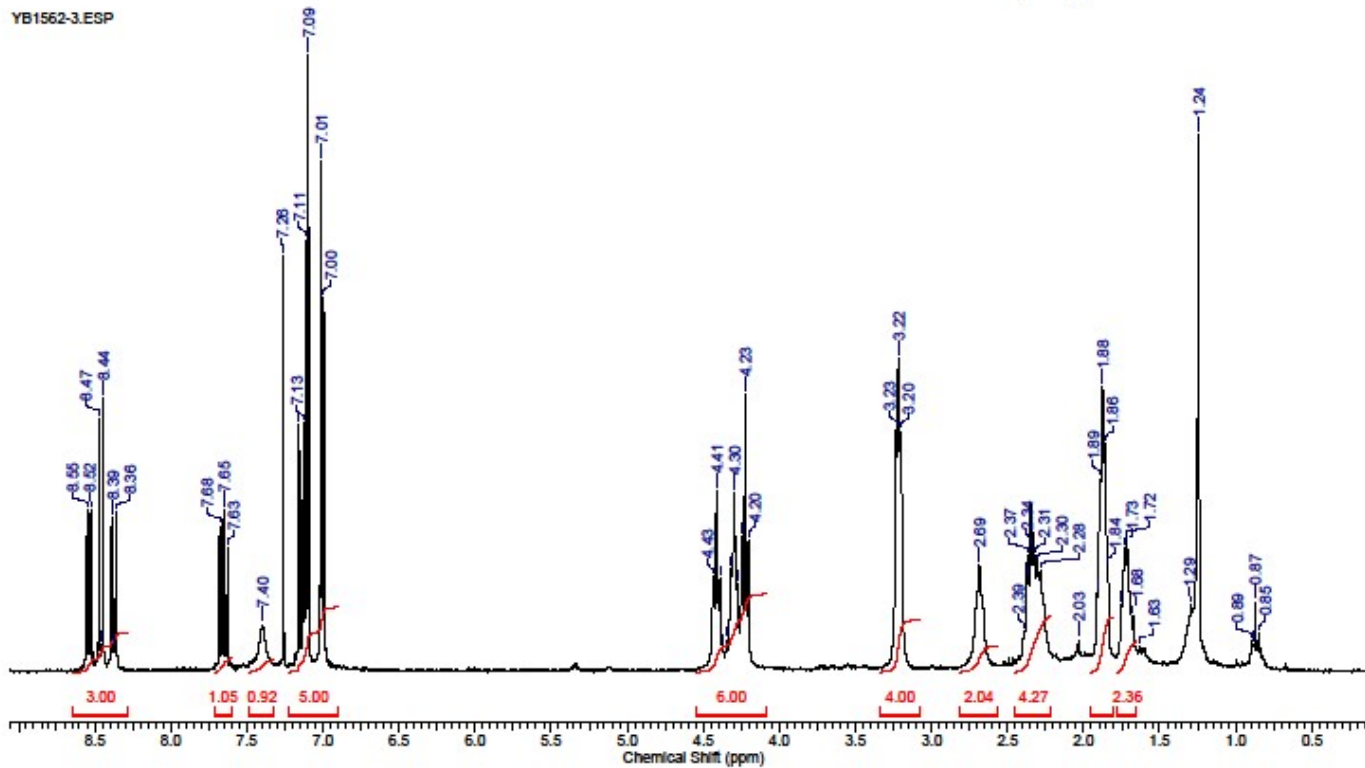

<sup>1</sup>H NMR DTPNap

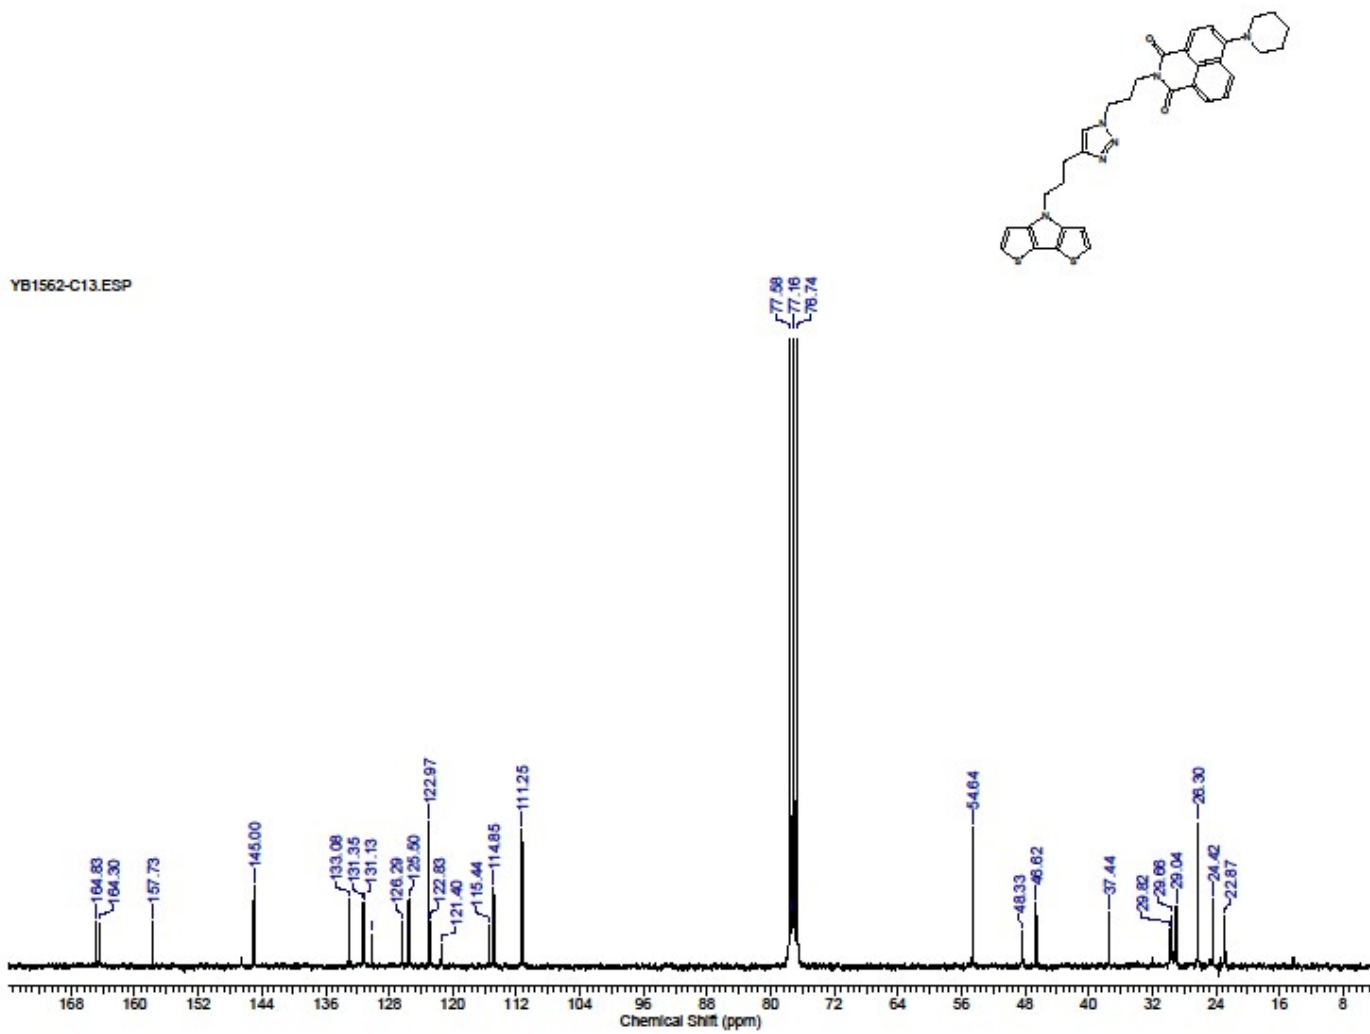

<sup>13</sup>C NMR DTPNap

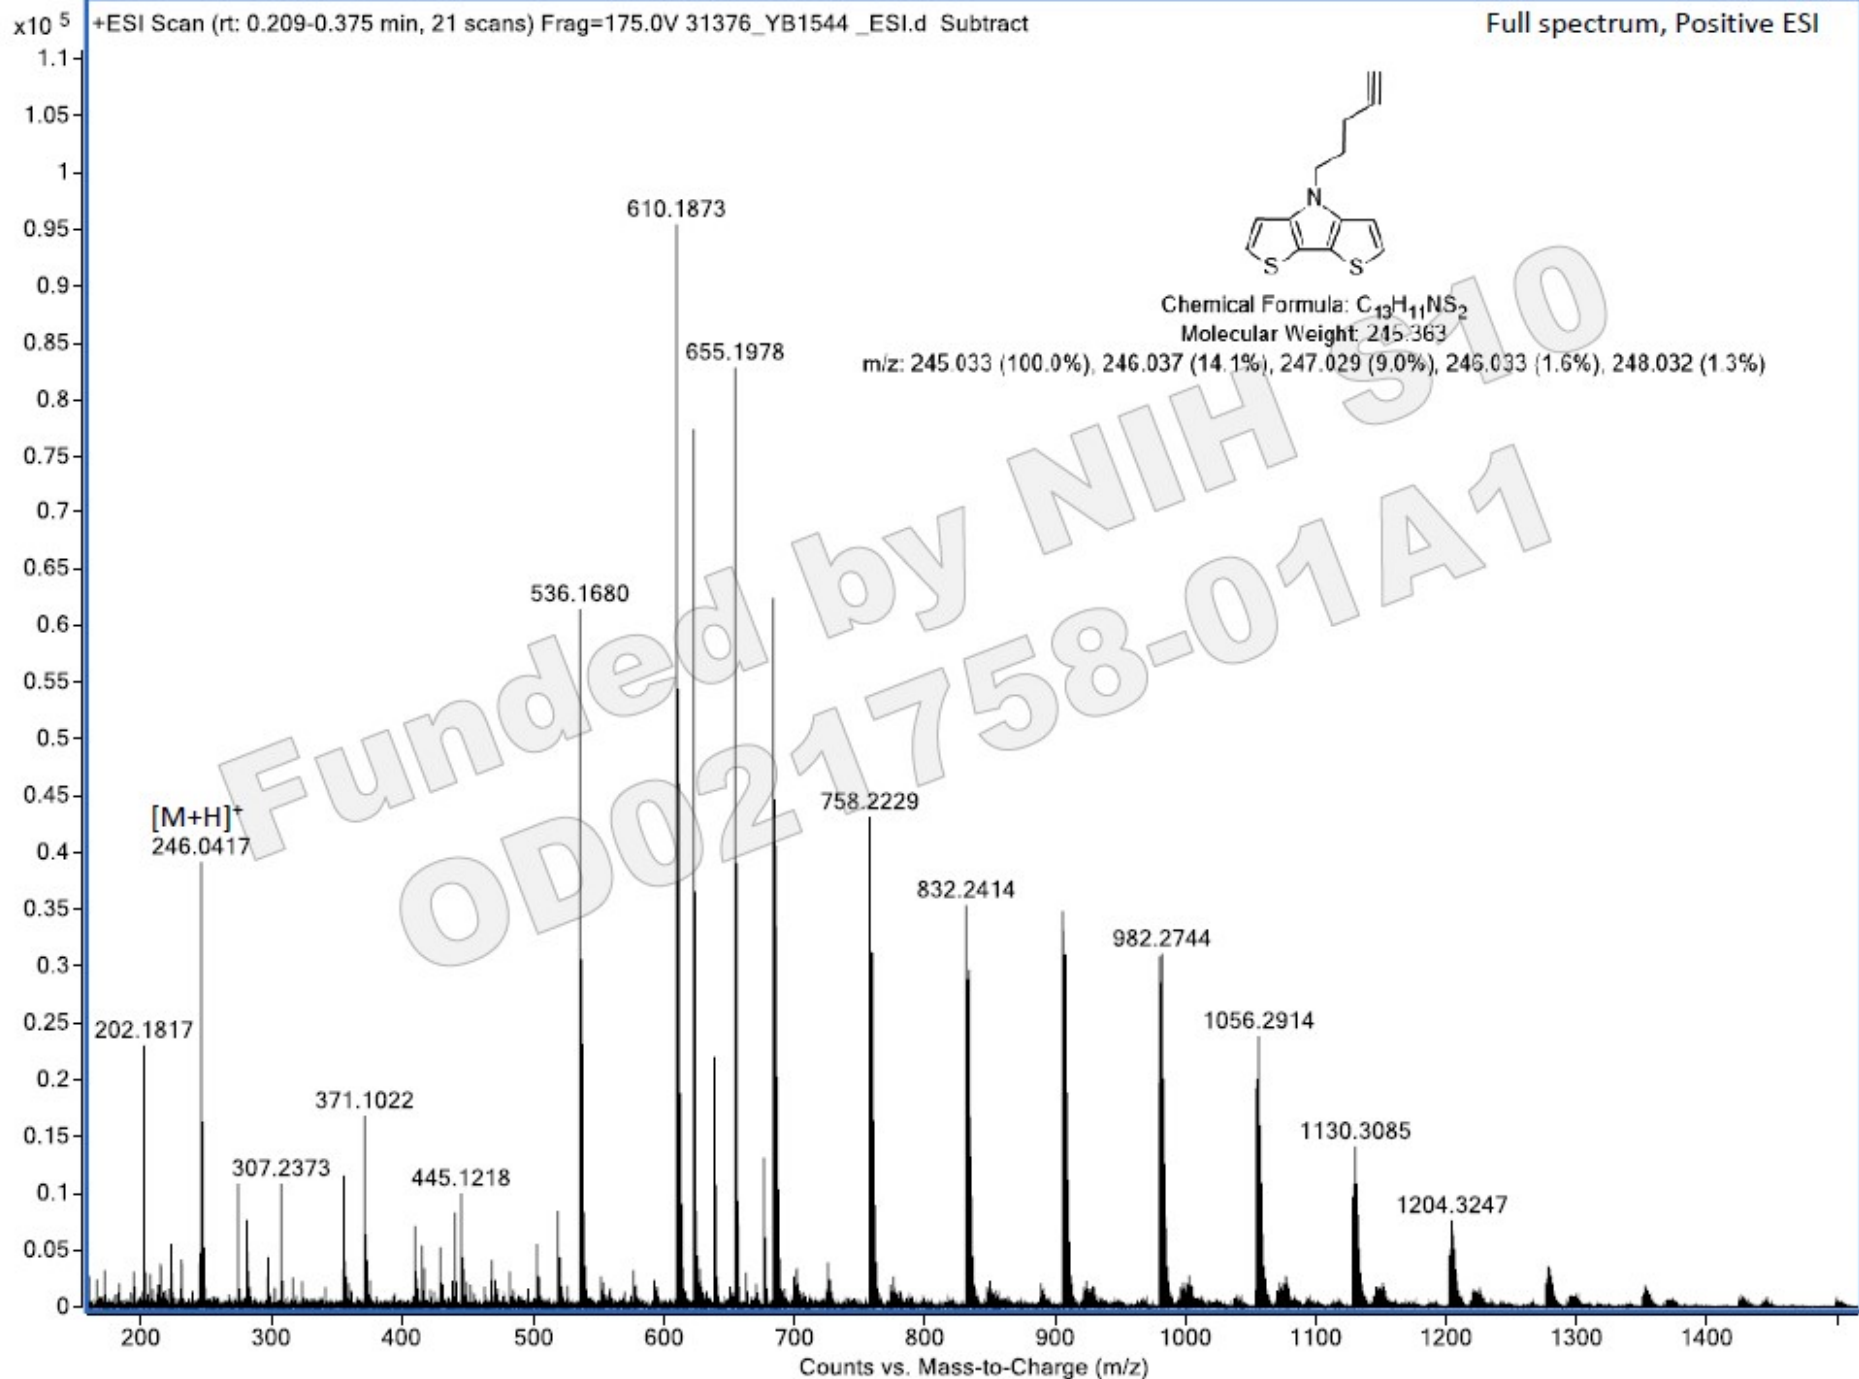

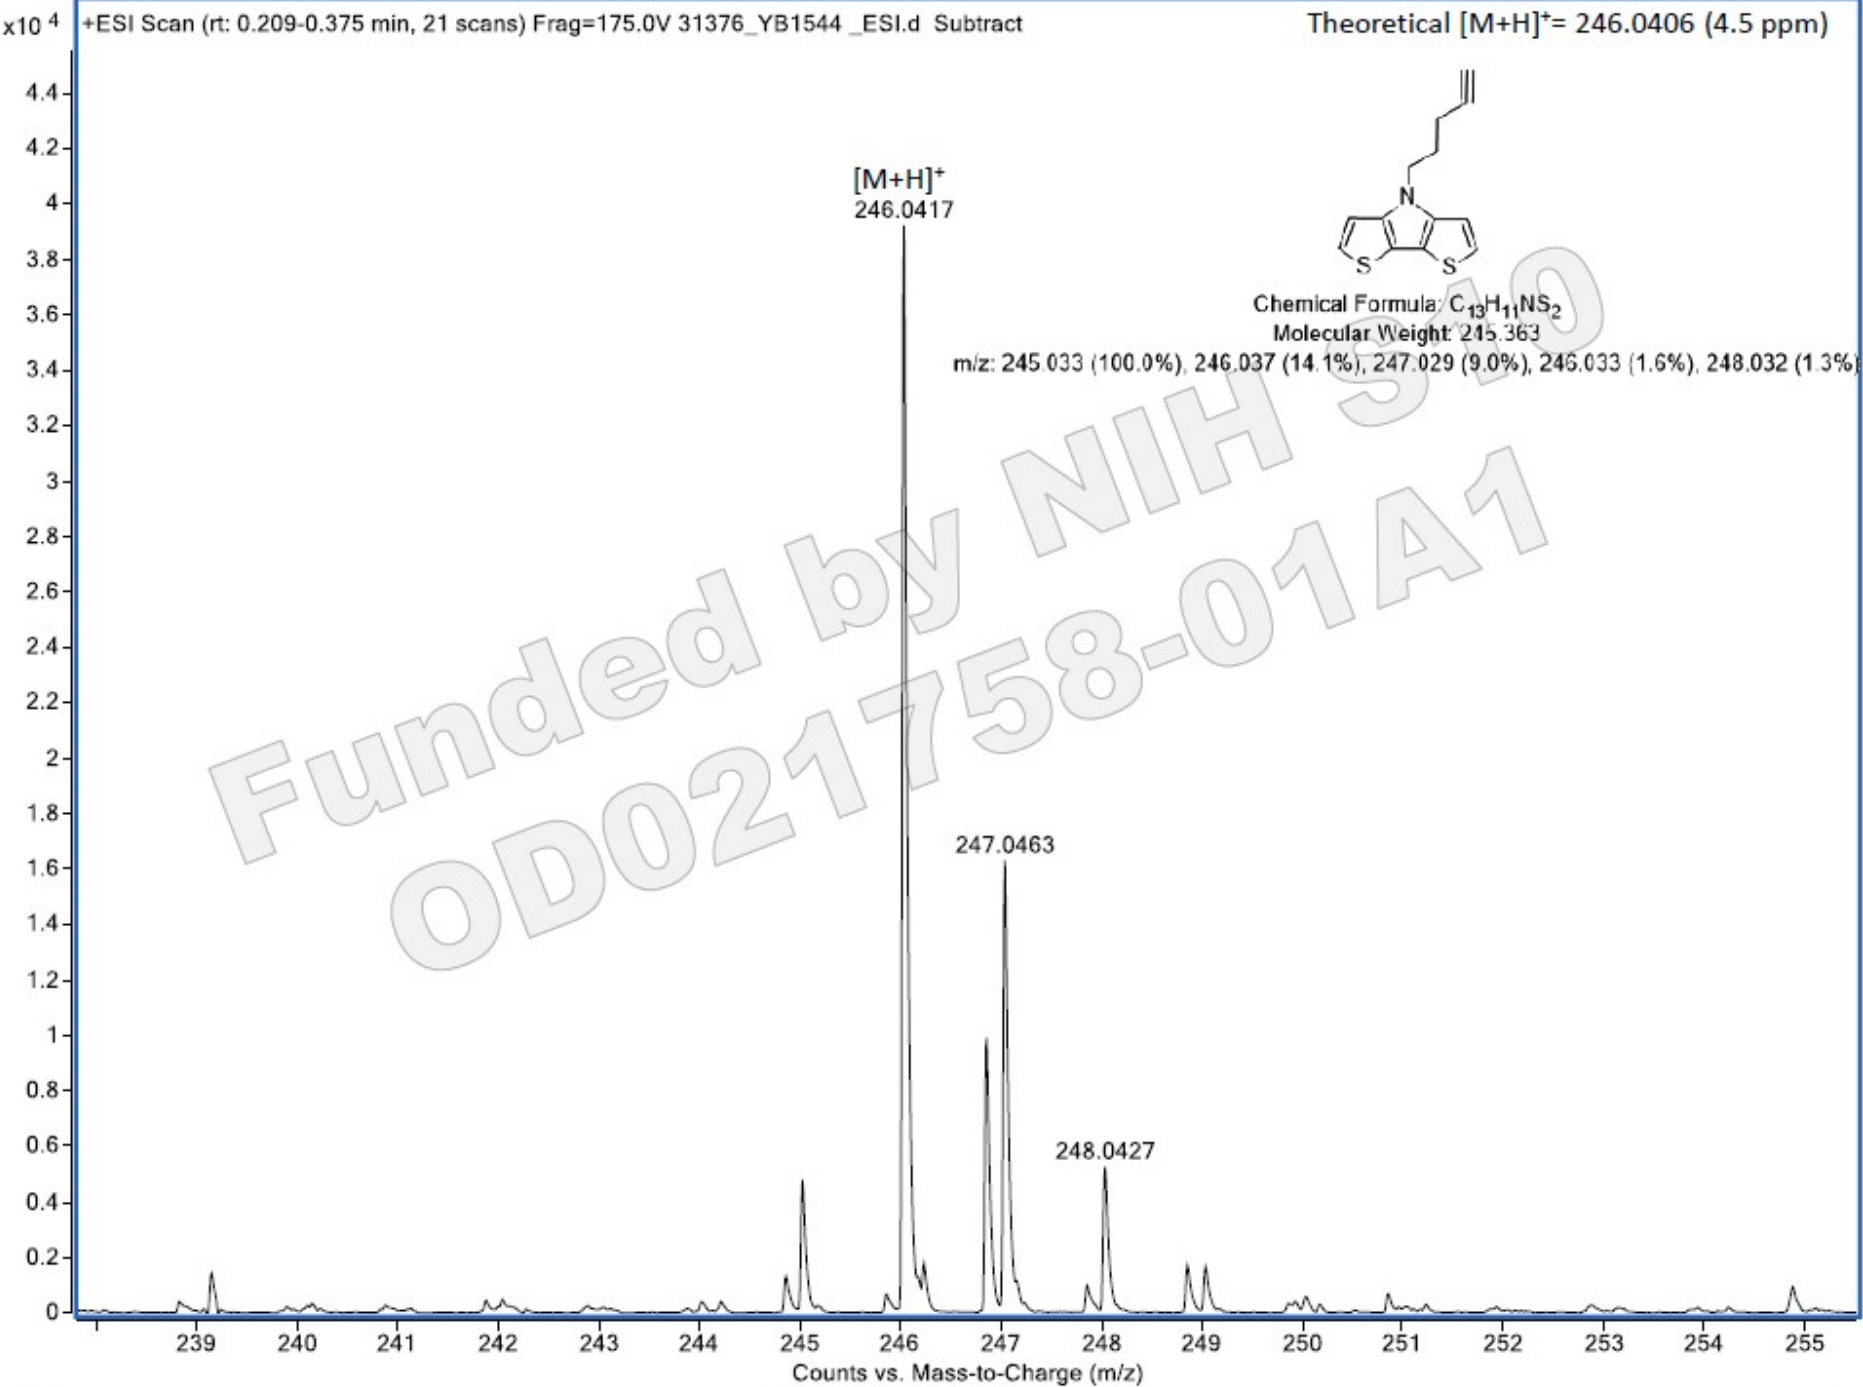

+ESI Scan (rt: 0.147-0.288 min, 18 scans) Frag=175.0V 31375\_YB1562\_ESI\_051121.d Subtract Full spectrum, Positive ESI

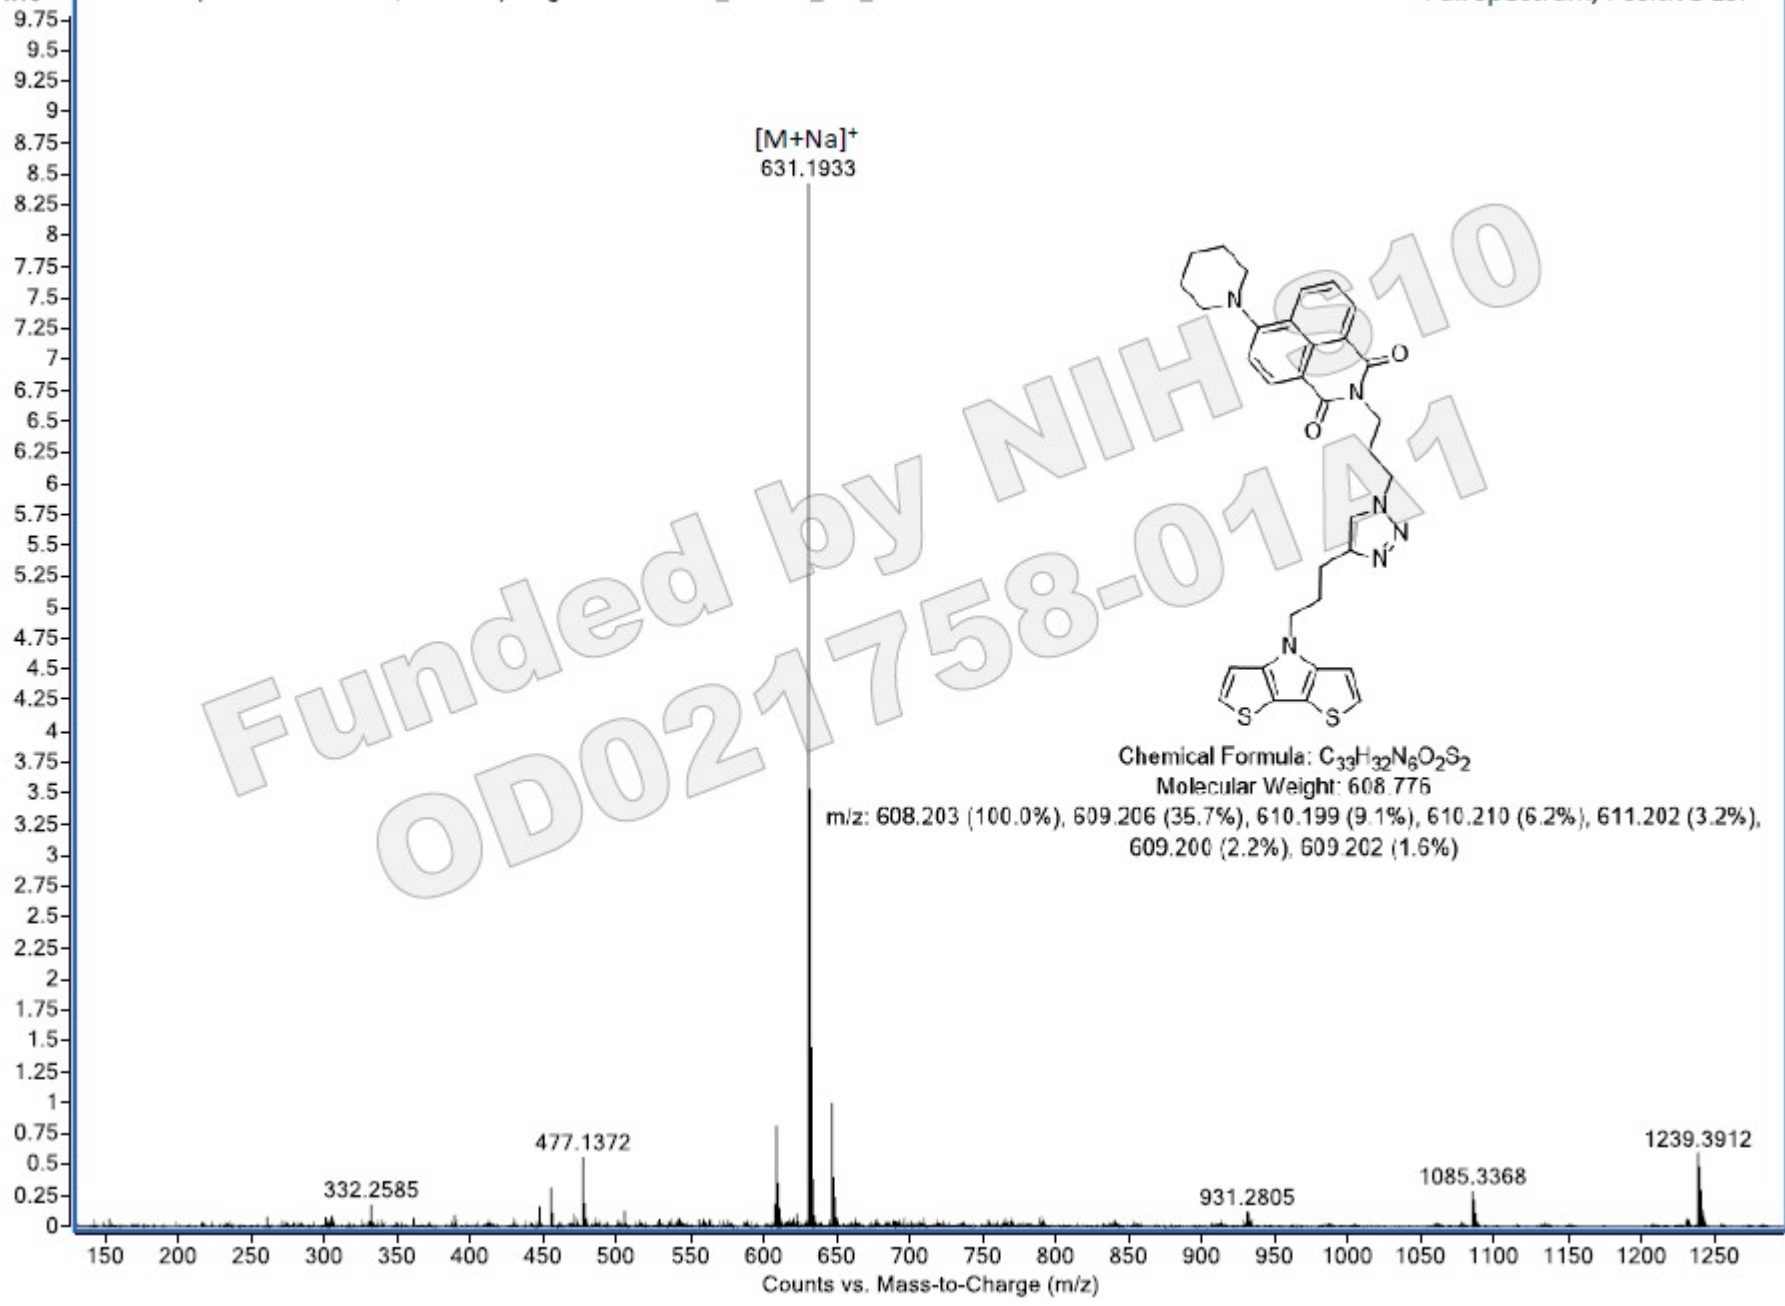



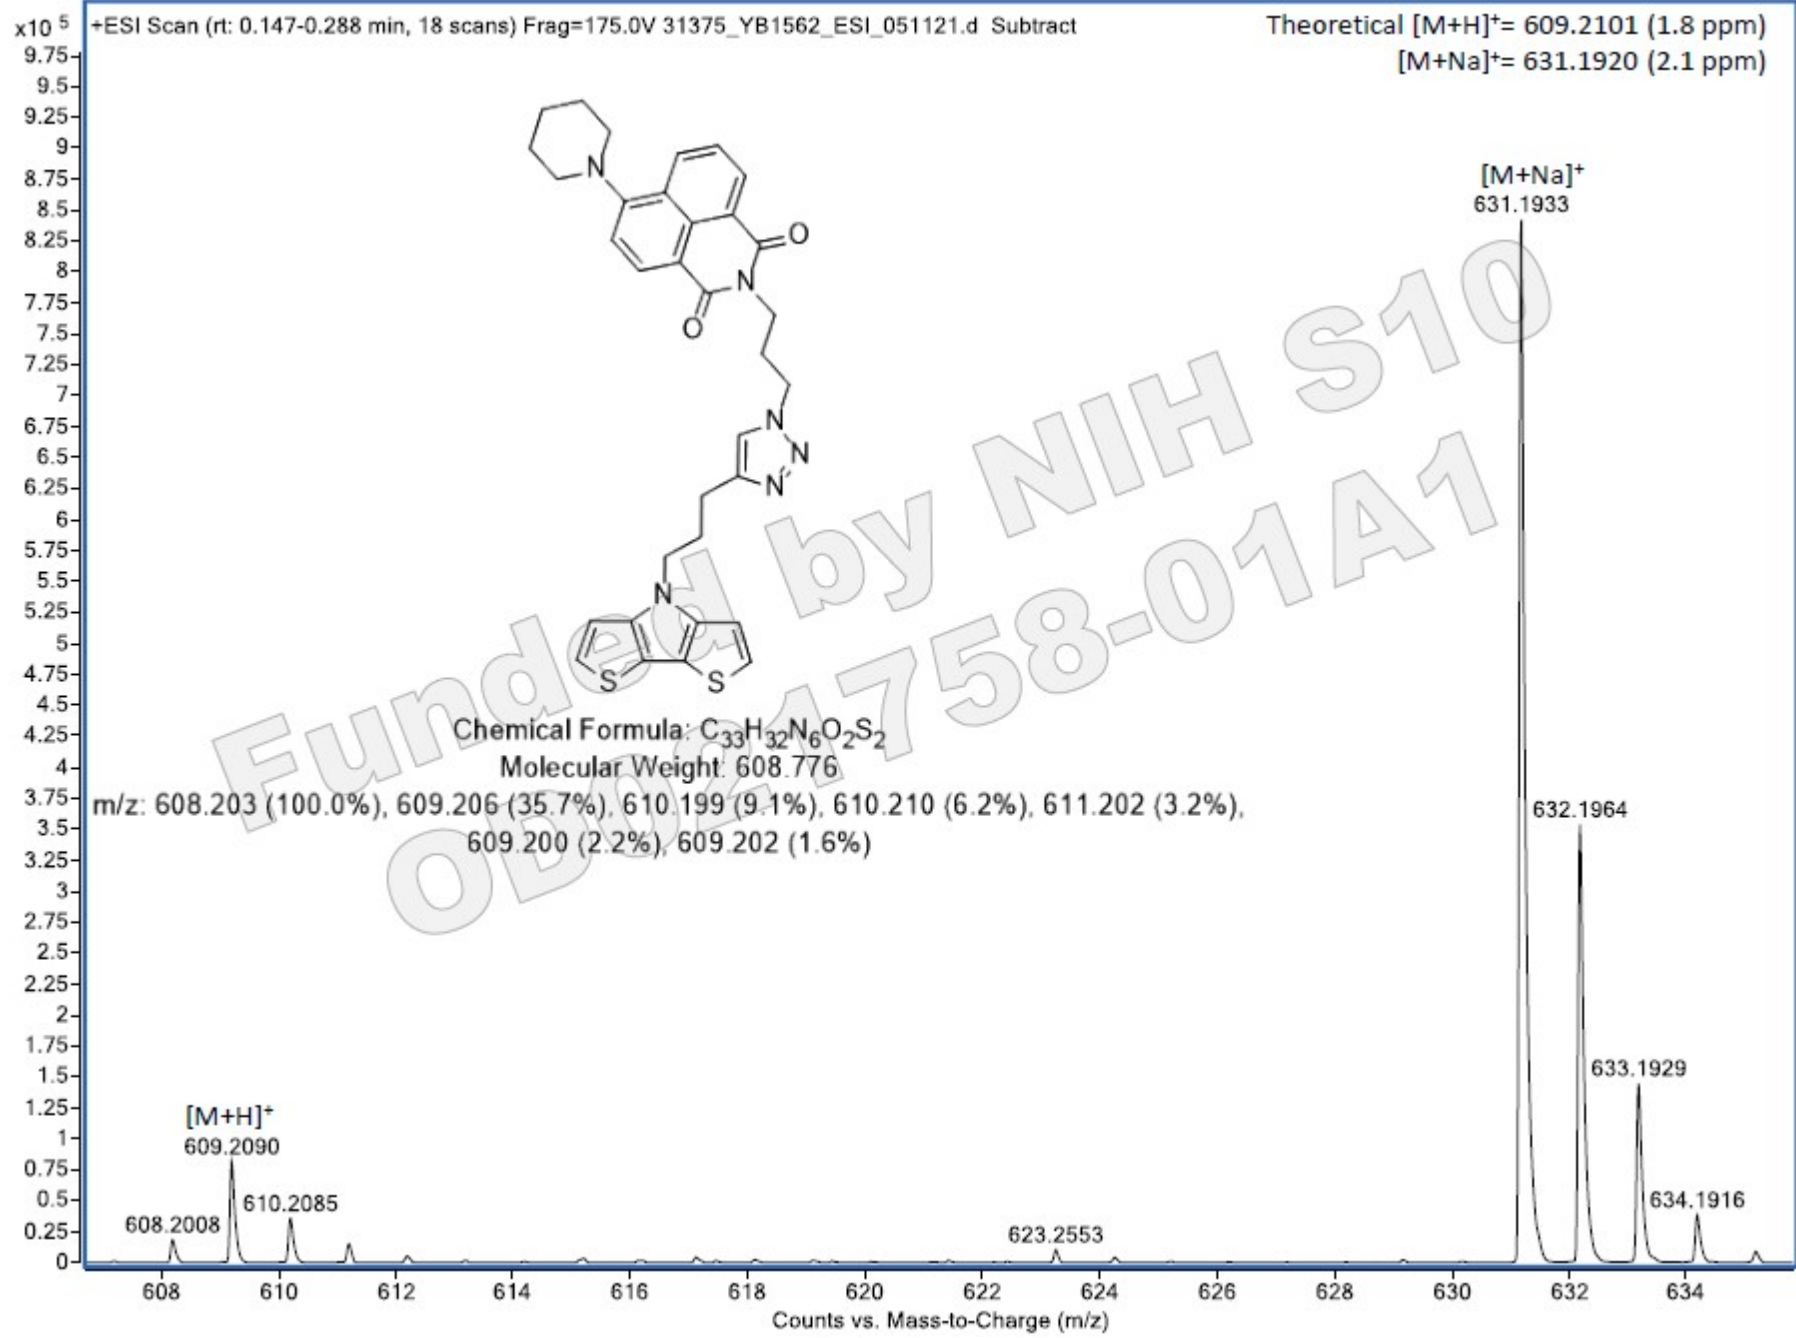

Supplement: d2ra03265a1.pdf [file d2ra03265a1.pdf]
